# Supplementary material
Source: MDPI journal article supplement (https://www.mdpi.com/2073-4441/15/9/1671)
Supplement: s1 [file s1]

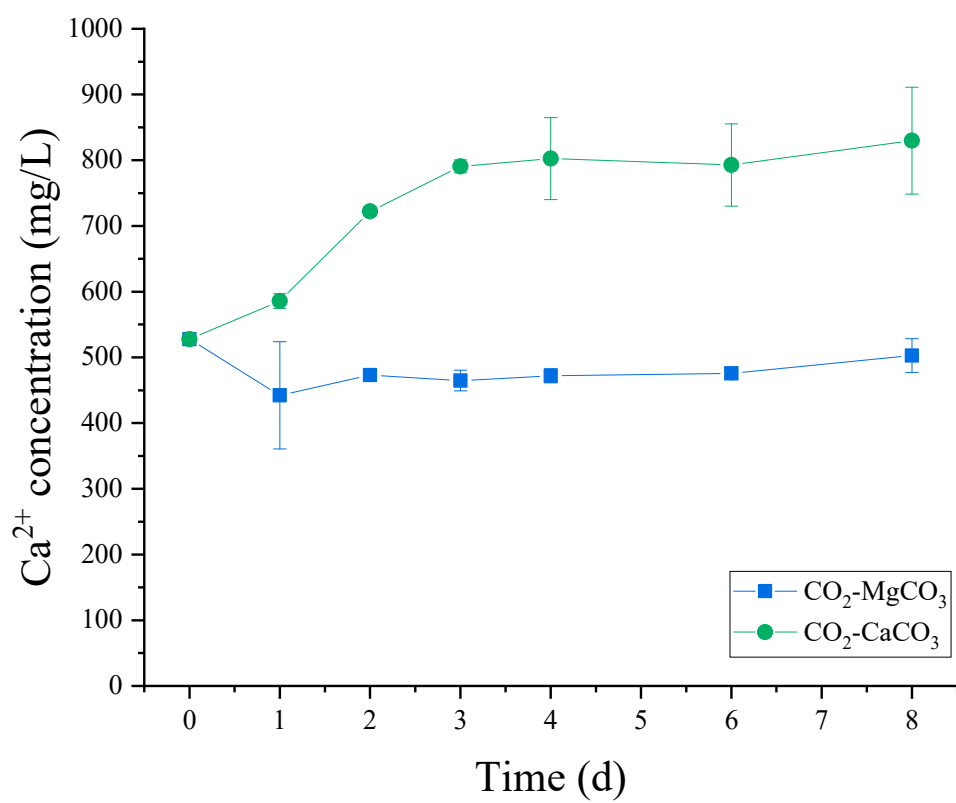

**Figure S1.**  $\text{Ca}^{2+}$  concentration in the  $\text{CO}_2\text{-NaHCO}_3$  and  $\text{CO}_2\text{-CaCO}_3$  culture system.

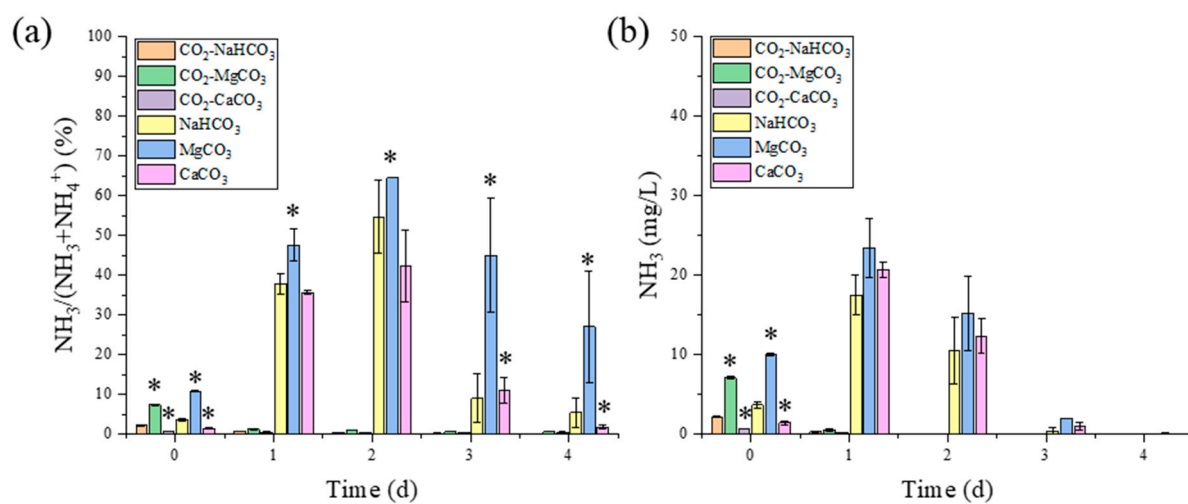

**Figure S2.** The estimated free ammonia ( $\text{NH}_3$ ) relative to the total ammonia ( $\text{NH}_3$  and  $\text{NH}_4^+$ ) (a) and the free ammonia concentration ( $\text{NH}_3$ , mg/L) in the medium (b) during the  $\text{NH}_4^+$ -N removal process. The asterisk (\*) indicated the significant difference ( $p < 0.05$ ) compared with the corresponding  $\text{NaHCO}_3$  culture.

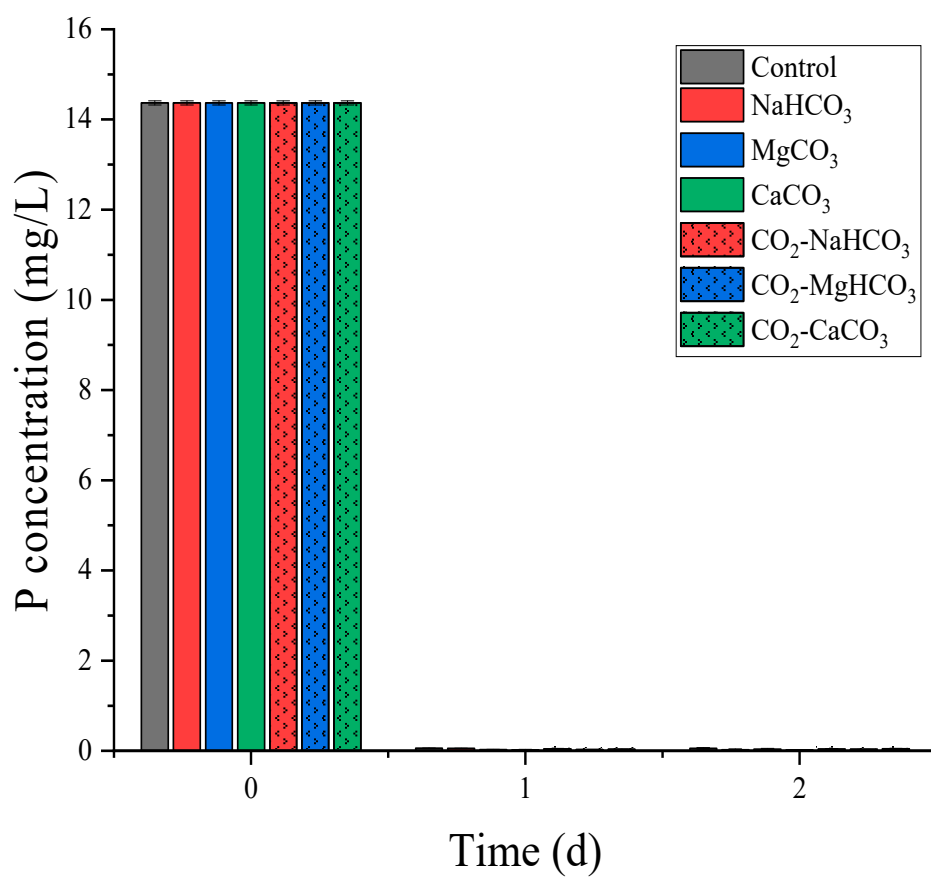

**Figure S3.** The phosphorus (P) concentration in the medium under IC (NaHCO<sub>3</sub>, MgCO<sub>3</sub> or CaCO<sub>3</sub>) or CO<sub>2</sub>-IC (NaHCO<sub>3</sub>, MgCO<sub>3</sub> or CaCO<sub>3</sub>) conditions during the NH<sub>4</sub><sup>+</sup>-N removal by *Tetraselmis subcordiformis*.

**Table S1** The calculated  $\text{NH}_4^+$ -N removal constant ( $k_N$ ) fitted with the first-order removal kinetics model  $N = N_0 \times e^{-k_N t}$  [75] and the estimated hydraulic retention time (HRT) with the formula of  $(N_i - N_e)/\text{HRT} = k_N \times N_e$  [76] where  $N_i$  and  $N_e$  were the influent (100 mg/L) and effluent (5 mg/L)  $\text{NH}_4^+$ -N concentration, respectively under continuous cultivation mode.

| Culture system      | Bicarbonate/carbonate supply | $k_N$ (day <sup>-1</sup> ) | Estimated HRT (day) |
|---------------------|------------------------------|----------------------------|---------------------|
| IC                  | NaHCO <sub>3</sub>           | 0.99                       | 19.2                |
|                     | MgCO <sub>3</sub>            | 0.89                       | 21.3                |
|                     | CaCO <sub>3</sub>            | 0.69                       | 27.5                |
| CO <sub>2</sub> -IC | NaHCO <sub>3</sub>           | 1.76                       | 10.8                |
|                     | MgCO <sub>3</sub>            | 1.95                       | 9.8                 |
|                     | CaCO <sub>3</sub>            | 1.69                       | 11.2                |
